# Supplementary material
Source: Springer Nature journal article supplement (https://www.springermedizin.de/resource/supplementary/13022_2009_34_MOESM5_ESM.pdf/9641342)
Supplement: MOESM5 [file 9641342]

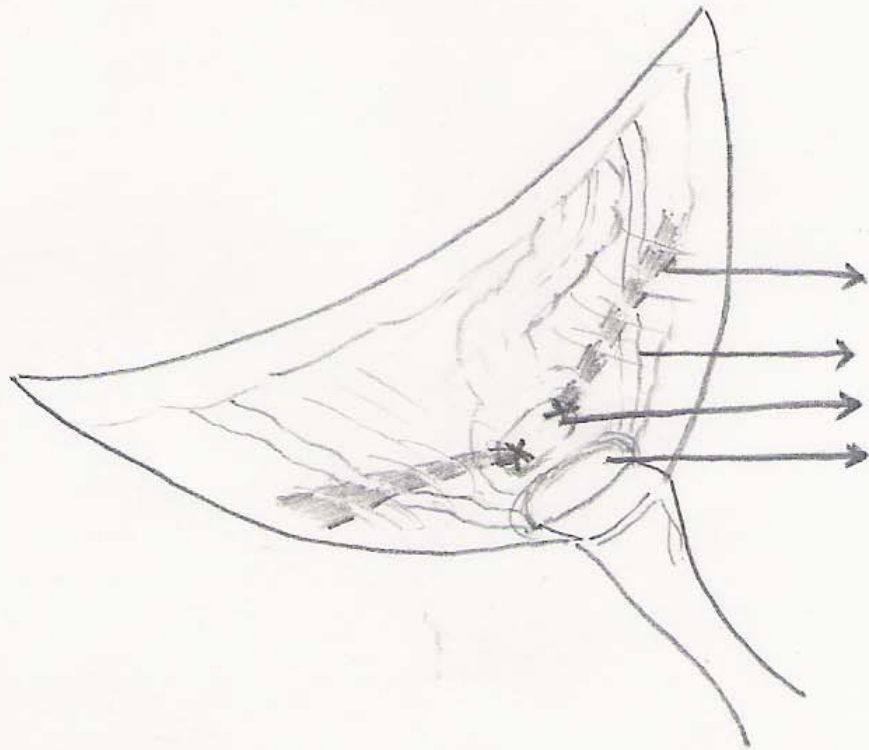

RECTUS FASCIA STRIPS (attached  
retroperitoneally to vaginal apex)

URETER

ELEVATED VAGINAL APEX

BLADDER
